# Supplementary material for: Transparent megahertz circuits from solution-processed composite thin films
Source: Royal Society of Chemistry journal article supplement (doi:10.1039/c6nr00602g), 2016-01-01
Supplement: c6nr00602g1.pdf [file c6nr00602g1.pdf]

## Transparent Megahertz Circuits from Solution-processed Composite Thin Films

Xingqiang Liu,<sup>a</sup> Da Wan,<sup>a</sup> Yun Wu,<sup>b</sup> Xiangheng Xiao,<sup>a</sup> Shishang Guo,<sup>a</sup> Changzhong Jiang,<sup>a</sup> Jinchai Li,<sup>a</sup> Tangsheng Chen,<sup>b</sup> Xiangfeng Duan,<sup>c</sup> Zhiyong Fan,<sup>d</sup> Lei Liao\*<sup>a</sup>

<sup>a</sup>Department of Physics and Key Laboratory of Artificial Micro- and Nano-structures of Ministry of Education, Wuhan University, Wuhan 430072, China; <sup>b</sup>Science and Technology on Monolithic Integrated Circuits and Modules Laboratory, Nanjing Electronic Device Institute, Nanjing 210016, China; <sup>c</sup>Department of Chemistry and Biochemistry, University of California, Los Angeles, CA 90095, USA; <sup>d</sup>Department of Electronic & Computer Engineering, The Hong Kong University of Science & Technology, Hong Kong SAR, China

RECEIVED DATE ( )

\*To whom correspondence should be addressed. E-mail: [liaolei@whu.edu.cn](mailto:liaolei@whu.edu.cn) (Lei Liao)

### Supplementary Information

#### 1. Typical gate current of the solution-processed a-IGZO/SWNTs composite TFT.

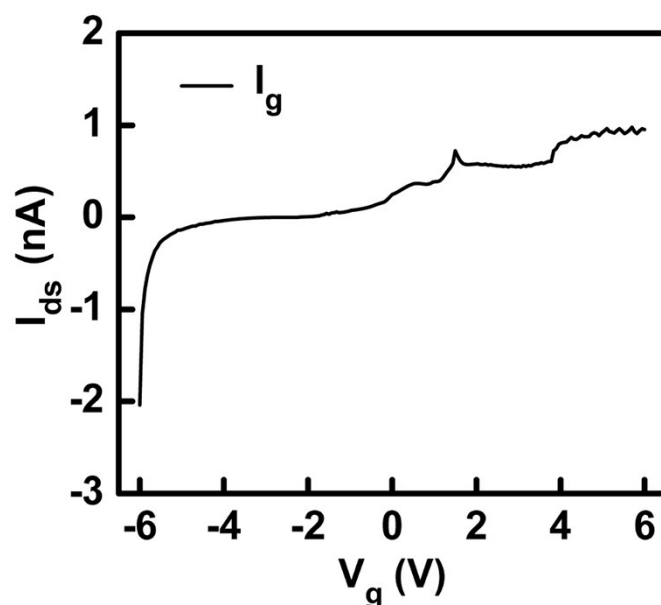

**Figure S1.** Typical gate current of the solution-processed a-IGZO/SWNTs composite TFT with 30 nm HfO<sub>2</sub> dielectric layer. The current was measured at  $V_{ds}=3$  V and  $V_g$  swept from -6 V to 6 V.
